# Supplementary material for: INAVA-ARNO complexes bridge mucosal barrier function with inflammatory signaling
Source: eLife journal article supplement (doi:10.7554/elife.38539), 2018-10-25
Supplement: supp [file elife-38539-supp-v1.zip]

Archive with 9 entries (9 files):
- elife_poa_e38539_Figure_3_source_data_3.xlsx
- elife_poa_e38539_Figure_2_figure_supplement_1.pdf
- elife_poa_e38539_Figure_1_figure_supplement_1.pdf
- elife_poa_e38539_Figure_3_source_data_2.xlsx
- elife_poa_e38539_Transparent_Reporting_File.docx
- elife_poa_e38539_Figure_3_source_data_4.xlsx
- elife_poa_e38539_Figure_4_figure_supplement_1.pdf
- elife_poa_e38539_Figure_3_figure_supplement_1.pdf
- elife_poa_e38539_Figure_3_source_data_1.xlsx
