# Supplementary material for: INAVA-ARNO complexes bridge mucosal barrier function with inflammatory signaling
Source: eLife journal article supplement (doi:10.7554/elife.38539), 2018-10-25
Supplement: supp [file elife-38539-supp-v1.zip › elife_poa_e38539_Figure_3_source_data_1.xlsx]

## Sheet: Sheet1
Source Data Files for Nf-kb Luciferase Reporter assays from Figure 3C
Figure 3C - left panel		Independent Experiment				Independent Experiment				Independent Experiment
		Fire Lucifease				Renilla Luciferase				Fire/Renilla Luciferase
		1	2	3		1	2	3		1	2	3
EV	mock	2622.5	4297	2796.5		2437.5	5978	24991		1.0759	0.718802	0.1119
INAVA	mock	4812.5	7419.5	6431.5		5143.5	7613	28039		0.935647	0.974583	0.229377
INAVA-S	mock	3604	4736	3994		5695.5	8090	30585		0.63278	0.585414	0.130587
EV	plus IL1b	42142.5	48103	15496		3465	6343	22500		12.1623	7.58364	0.688711
INAVA	plus IL1b	144265	127590	42784		5102	7201	25594		28.2762	17.7184	1.67164
INAVA-S	plus IL1b	60877.5	93246	27585		5664.5	8640	28827.5		10.7472	10.7924	0.956899
Figure 3C - right panel		Independent Experiment				Independent Experiment				Independent Experiment
		Fire Lucifease				Renilla Luciferase				Fire/Renilla Luciferase
		1	2	3		1	2	3		1	2	3
EV	mock	13044	11795	573		33980.5	17306.5	39533		0.383867	0.681536	0.0144942
INAVA	mock	8138.5	7500.5	118.5		25257	8003.5	29221		0.322228	0.937152	0.0040553
INAVA-S	mock	16600	6669.5	2028.5		32267.5	11086.5	57508		0.51445	0.601588	0.0352734
EV	plusTraf6	95880	284456	7176		20251.5	13750.5	49827		4.73446	20.6869	0.144018
INAVA	plusTraf6	1297628	2154636	52237.5		13846	16635	42680		93.7186	129.524	1.22393
INAVA-S	plusTraf6	785718	729574	7686.5		25558.5	18508.5	48517		30.7419	39.4183	0.158429

## Sheet: Sheet2
Source Data Files for Nf-kb Luciferase Reporter assays from Figure 3D
Figure 3D		Independent Experiment				Independent Experiment				Independent Experiment
		Fire Lucifease				Renilla Luciferase				Fire/Renilla Luciferase
		1	2	3		1	2	3		1	2	3
EV	mock	3376.5	21790.5	26832		16465	21939	22372		0.205071	0.993231	1.19936
INAVA	mock	4171	36461	44647.5		15032.5	18879	17106		0.277465	1.9313	2.61005
deltaCUPID	mock	3268	9575.5	9853		19449.5	18887	14116		0.168025	0.506989	0.698002
CUPID	mock	6493	21807	40293		26786.5	23768.5	24693		0.242398	0.917475	1.63176
EV	plus IL1b	134560	916946	553643		18667	20862	19069		7.20847	43.953	29.0337
INAVA	plus IL1b	342214	1572195	1197370		18960	18552.5	17405		18.0493	84.743	68.7946
deltaCUPID	plus IL1b	193304	1.0459e+06	554948		20533.5	17276.5	13952.5		9.41406	60.539	39.7741
CUPID	plus IL1b	199323	1080423	635512		28404	23047	21485		7.01743	46.8791	29.5793

## Sheet: Sheet3
Source Data Files for Nf-kb Luciferase Reporter assays from Figure 3E
Figure 3E - left panel		Independent Experiment				Independent Experiment				Independent Experiment
		Fire Lucifease				Renilla Luciferase				Fire/Renilla Luciferase
		1	2	3		1	2	3		1	2	3
EV	WTHEK	18680.5	30588	7619.5		82903	32991	17658.5		0.22533	0.927162	0.431492
INAVA	WTHEK	36678.5	21148	16382.5		120055	15400	22401		0.305514	1.37325	0.731329
EV	WTHEK+IL1b	327488	258910	325948		135007	28286.5	17603.5		2.42571	9.15315	18.5161
INAVA	WTHEK+IL1b	650142	578742	794013		103279	19075	28504		6.29501	30.3404	27.8562
EV	TraftKO	14572	28768.5	8775		34482.5	21270	19614		0.422591	1.35254	0.447385
INAVA	Traf6KO	29730	21028.5	28585		42925.5	12554.5	30354.5		0.692595	1.67498	0.941706
EV	Traf6KO+IL1b	22432.5	49473	11151.5		33010	20231	21066.5		0.679567	2.44541	0.529348
INAVA	Traf6KO+IL1b	41505.5	77946	27190.5		42325.5	14460.5	33521.5		0.980626	5.39027	0.811136
Figure 3E - right panel		Independent Experiment				Independent Experiment				Independent Experiment
		Fire Lucifease				Renilla Luciferase				Fire/Renilla Luciferase
		1	2	3		1	2	3		1	2	3
EV	EV	894	7321	637		549.5	13394	8105		1.62693	0.546588	0.0785935
INAVA	EV	688	10888.5	745.5		377.5	14791.5	7815.5		1.82252	0.736132	0.0953874
EV	TRAF6	6446	38520.5	17857.5		498	13803	19499		12.9438	2.79073	0.915816
INAVA	TRAF6	46223	99307	41396.5		1286.5	13659.5	16812		35.9293	7.27018	2.46232
EV	TRAF6 CA	844.5	5770	574.5		324	15107.5	8399		2.60648	0.38193	0.068401
INAVA	TRAF6 CA	1398.5	8089.5	4214.5		263.5	12539	10281		5.3074	0.645147	0.409931

## Sheet: Sheet4
Source Data Files for Nf-kb Luciferase Reporter assays from Figure 3F
Figure 3F		Independent Experiment				Independent Experiment				Independent Experiment
		Fire Lucifease				Renilla Luciferase				Fire/Renilla Luciferase
		1	2	3		1	2	3		1	2	3
EV	mock	4297	82765	8671		5978	25017	50550.5		0.718802	3.30835	0.171531
INAVA	mock	7419.5	261563	19241.5		7613	33754.5	44700		0.974583	7.74898	0.430459
ARNO	mock	5978	66685.5	6081.5		6716	22971.5	35550		0.990268	2.90297	0.171069
INAVA+ARNO	mock	7613	95030	10433		4736	23909.5	36805		0.585414	3.97457	0.283467
EV	plusIL1b	48103	194784	178588		6343	23000	41574.5		7.58364	8.46885	4.29561
INAVA	plusIL1b	127590	1002849	829772		7201	38049	45035.5		17.7184	26.3568	18.4248
ARNO	plusIL1b	17405.5	155849	86580		2900	21663	29872		6.0019	7.19425	2.89837
INAVA+ARNO	plusIL1b	28800	330192	257460		3724	23265.5	35132.5		7.73362	14.1924	7.32826
