# Supplementary material for: INAVA-ARNO complexes bridge mucosal barrier function with inflammatory signaling
Source: eLife journal article supplement (doi:10.7554/elife.38539), 2018-10-25
Supplement: supp [file elife-38539-supp-v1.zip › elife_poa_e38539_Figure_3_source_data_2.xlsx]

## Sheet: Sheet1
Source Data Files for Nf-kb Luciferase Reporter assays from Figure 3D
Figure 3D		Independent Experiment				Independent Experiment				Independent Experiment
		Fire Lucifease				Renilla Luciferase				Fire/Renilla Luciferase
		1	2	3		1	2	3		1	2	3
EV	mock	3376.5	21790.5	26832		16465	21939	22372		0.205071	0.993231	1.19936
INAVA	mock	4171	36461	44647.5		15032.5	18879	17106		0.277465	1.9313	2.61005
deltaCUPID	mock	3268	9575.5	9853		19449.5	18887	14116		0.168025	0.506989	0.698002
CUPID	mock	6493	21807	40293		26786.5	23768.5	24693		0.242398	0.917475	1.63176
EV	plus IL1b	134560	916946	553643		18667	20862	19069		7.20847	43.953	29.0337
INAVA	plus IL1b	342214	1572195	1197370		18960	18552.5	17405		18.0493	84.743	68.7946
deltaCUPID	plus IL1b	193304	1.0459e+06	554948		20533.5	17276.5	13952.5		9.41406	60.539	39.7741
CUPID	plus IL1b	199323	1080423	635512		28404	23047	21485		7.01743	46.8791	29.5793
