# Supplementary material for: INAVA-ARNO complexes bridge mucosal barrier function with inflammatory signaling
Source: eLife journal article supplement (doi:10.7554/elife.38539), 2018-10-25
Supplement: supp [file elife-38539-supp-v1.zip › elife_poa_e38539_Figure_3_source_data_3.xlsx]

## Sheet: Sheet1
Source Data Files for Nf-kb Luciferase Reporter assays from Figure 3E
Figure 3E - left panel		Independent Experiment				Independent Experiment				Independent Experiment
		Fire Lucifease				Renilla Luciferase				Fire/Renilla Luciferase
		1	2	3		1	2	3		1	2	3
EV	WTHEK	18680.5	30588	7619.5		82903	32991	17658.5		0.22533	0.927162	0.431492
INAVA	WTHEK	36678.5	21148	16382.5		120055	15400	22401		0.305514	1.37325	0.731329
EV	WTHEK+IL1b	327488	258910	325948		135007	28286.5	17603.5		2.42571	9.15315	18.5161
INAVA	WTHEK+IL1b	650142	578742	794013		103279	19075	28504		6.29501	30.3404	27.8562
EV	TraftKO	14572	28768.5	8775		34482.5	21270	19614		0.422591	1.35254	0.447385
INAVA	Traf6KO	29730	21028.5	28585		42925.5	12554.5	30354.5		0.692595	1.67498	0.941706
EV	Traf6KO+IL1b	22432.5	49473	11151.5		33010	20231	21066.5		0.679567	2.44541	0.529348
INAVA	Traf6KO+IL1b	41505.5	77946	27190.5		42325.5	14460.5	33521.5		0.980626	5.39027	0.811136
Figure 3E - right panel		Independent Experiment				Independent Experiment				Independent Experiment
		Fire Lucifease				Renilla Luciferase				Fire/Renilla Luciferase
		1	2	3		1	2	3		1	2	3
EV	EV	894	7321	637		549.5	13394	8105		1.62693	0.546588	0.0785935
INAVA	EV	688	10888.5	745.5		377.5	14791.5	7815.5		1.82252	0.736132	0.0953874
EV	TRAF6	6446	38520.5	17857.5		498	13803	19499		12.9438	2.79073	0.915816
INAVA	TRAF6	46223	99307	41396.5		1286.5	13659.5	16812		35.9293	7.27018	2.46232
EV	TRAF6 CA	844.5	5770	574.5		324	15107.5	8399		2.60648	0.38193	0.068401
INAVA	TRAF6 CA	1398.5	8089.5	4214.5		263.5	12539	10281		5.3074	0.645147	0.409931
