# Supplementary material for: INAVA-ARNO complexes bridge mucosal barrier function with inflammatory signaling
Source: eLife journal article supplement (doi:10.7554/elife.38539), 2018-10-25
Supplement: supp [file elife-38539-supp-v1.zip › elife_poa_e38539_Figure_3_source_data_4.xlsx]

## Sheet: Sheet1
Source Data Files for Nf-kb Luciferase Reporter assays from Figure 3F
Figure 3F		Independent Experiment				Independent Experiment				Independent Experiment
		Fire Lucifease				Renilla Luciferase				Fire/Renilla Luciferase
		1	2	3		1	2	3		1	2	3
EV	mock	4297	82765	8671		5978	25017	50550.5		0.718802	3.30835	0.171531
INAVA	mock	7419.5	261563	19241.5		7613	33754.5	44700		0.974583	7.74898	0.430459
ARNO	mock	5978	66685.5	6081.5		6716	22971.5	35550		0.990268	2.90297	0.171069
INAVA+ARNO	mock	7613	95030	10433		4736	23909.5	36805		0.585414	3.97457	0.283467
EV	plusIL1b	48103	194784	178588		6343	23000	41574.5		7.58364	8.46885	4.29561
INAVA	plusIL1b	127590	1002849	829772		7201	38049	45035.5		17.7184	26.3568	18.4248
ARNO	plusIL1b	17405.5	155849	86580		2900	21663	29872		6.0019	7.19425	2.89837
INAVA+ARNO	plusIL1b	28800	330192	257460		3724	23265.5	35132.5		7.73362	14.1924	7.32826
